# Supplementary material for: Low-temperature CO oxidation over manganese, cobalt, and nickel doped CeO2 nanorods
Source: Royal Society of Chemistry journal article supplement (doi:10.1039/c6ra13577c), 2016-01-01
Supplement: c6ra13577c1.pdf [file c6ra13577c1.pdf]

## **Low-temperature CO oxidation over manganese, cobalt, and nickel doped CeO<sub>2</sub> nanorods**

Deshetti Jampaiah,<sup>a</sup> P. Venkataswamy,<sup>b</sup> Victoria Elizabeth Coyle,<sup>a</sup> Benjaram M. Reddy\*<sup>b</sup> and Suresh K. Bhargava\*<sup>a</sup>

*<sup>a</sup>Centre for Advanced Materials & Industrial Chemistry (CAMIC), School of Applied Sciences, RMIT University, GPO BOX 2476, Melbourne–3001, Australia*

*<sup>b</sup>Inorganic and Physical Chemistry Division, Indian Institute of Chemical Technology (IICT), Hyderabad - 500 007, Uppal Road, India*

Corresponding authors\*

E-mail: [bmreddy@iiict.res.in](mailto:bmreddy@iiict.res.in); Tel: +91 40 27193510

E-mail: [suresh.bhargava@rmit.edu.in](mailto:suresh.bhargava@rmit.edu.in); Tel: +61 3 9925 3365

**Table S1** The Mn, Co, and Ni content of  $\text{Ce}_{0.9}\text{Mn}_{0.1}\text{O}_{2-\delta}$  (Mn-CeO<sub>2</sub>),  $\text{Ce}_{0.9}\text{Co}_{0.1}\text{O}_{2-\delta}$  (Co-CeO<sub>2</sub>), and  $\text{Ce}_{0.9}\text{Ni}_{0.1}\text{O}_{2-\delta}$  (Ni-CeO<sub>2</sub>) NRs determined from ICP-OES analysis.

| Sample              | Nominal metal content (%) | Calculated metal content (%) |
|---------------------|---------------------------|------------------------------|
| Mn-CeO <sub>2</sub> | 10                        | 9.82                         |
| Co-CeO <sub>2</sub> | 10                        | 9.79                         |
| Ni-CeO <sub>2</sub> | 10                        | 9.87                         |

**Table S2** The  $T_{50}$  values of  $\text{Ce}_{0.9}\text{Co}_{0.1}\text{O}_{2-\delta}$  (Co-CeO<sub>2</sub>), and  $\text{Ce}_{0.9}\text{Zr}_{0.1}\text{O}_{2-\delta}$  (Zr-CeO<sub>2</sub>) NRs.

| Sample              | $T_{50}$ | Reference    |
|---------------------|----------|--------------|
| Zr-CeO <sub>2</sub> | 265 °C   | 9            |
| Co-CeO <sub>2</sub> | 145 °C   | Current work |

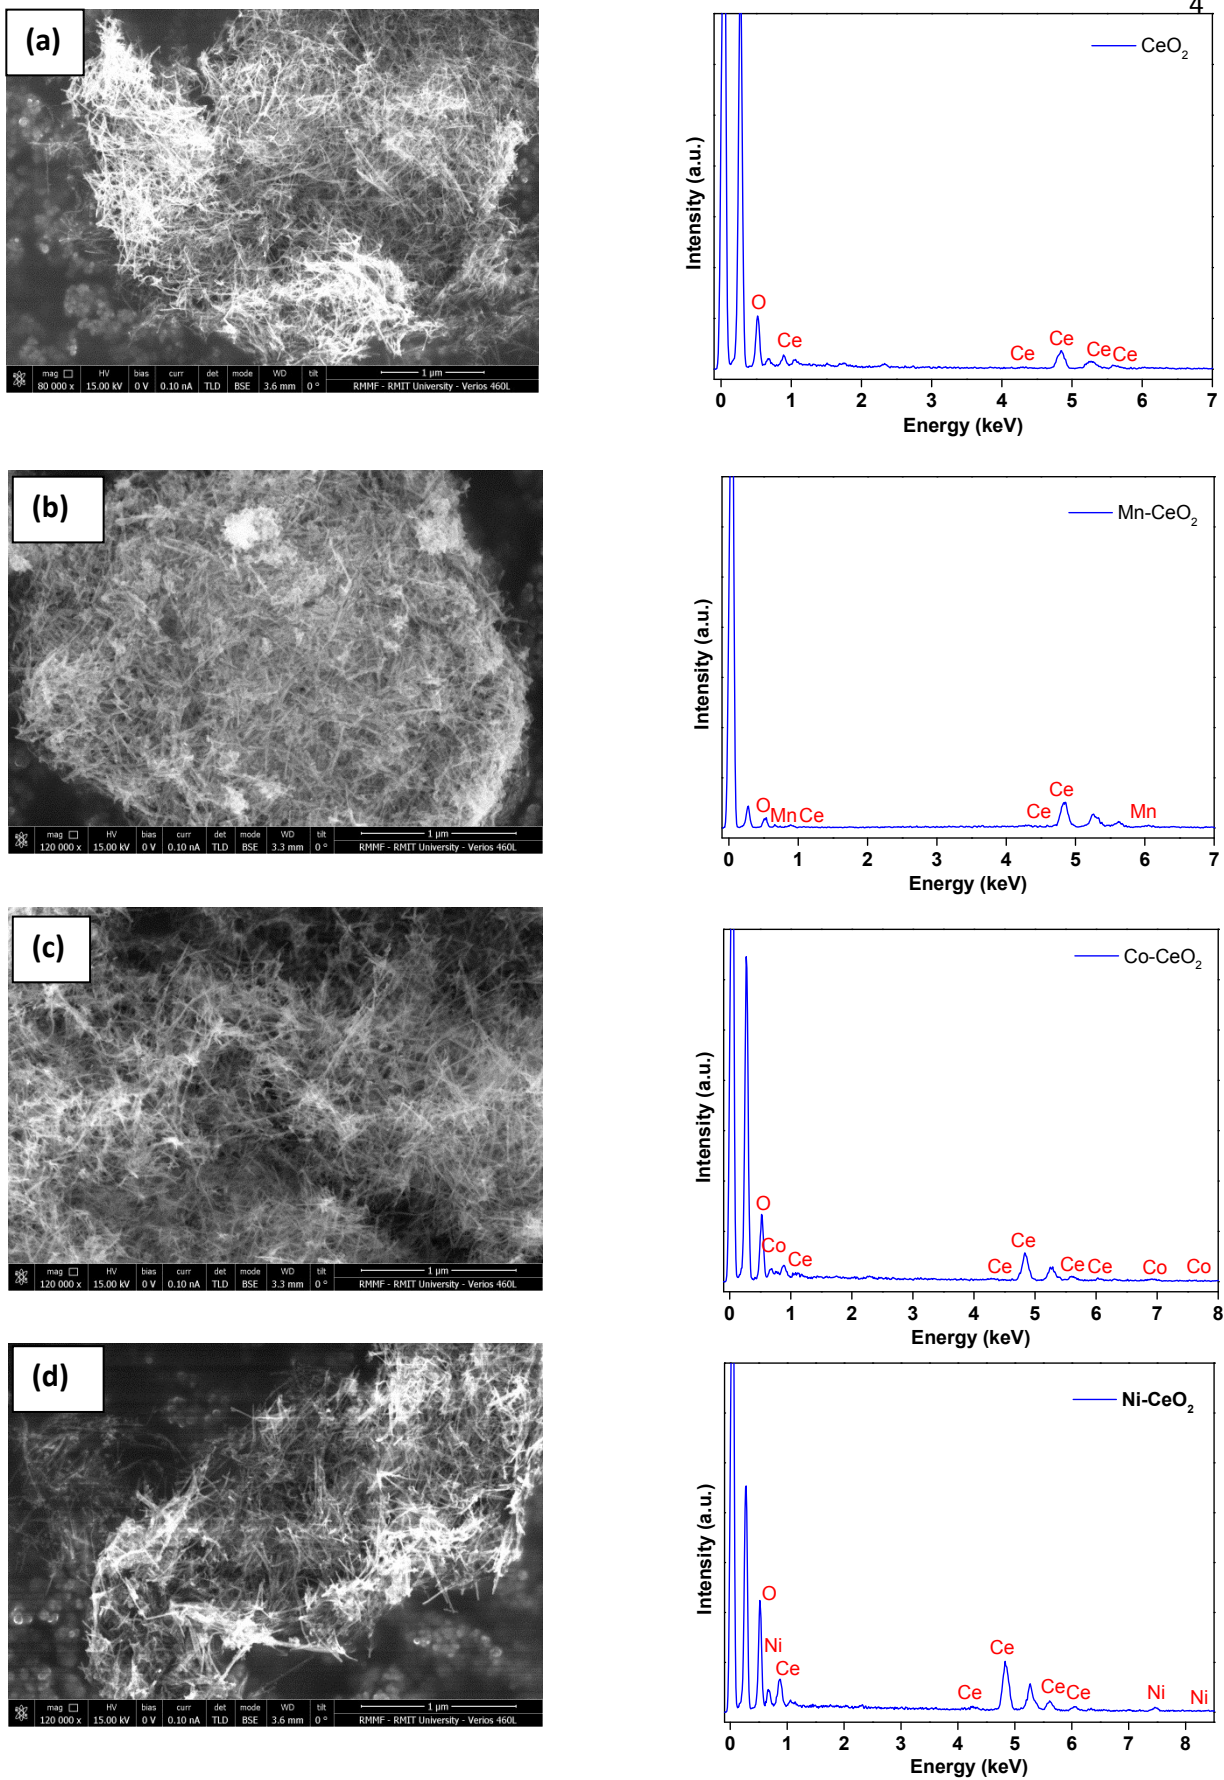

Fig. S1 SEM images of (a)  $\text{CeO}_2$ , (b)  $\text{Ce}_{0.9}\text{Mn}_{0.1}\text{O}_{2-\delta}$  (Mn-CeO<sub>2</sub>), (c)  $\text{Ce}_{0.9}\text{Co}_{0.1}\text{O}_{2-\delta}$  (Co-CeO<sub>2</sub>), and (d)  $\text{Ce}_{0.9}\text{Ni}_{0.1}\text{O}_{2-\delta}$  (Ni-CeO<sub>2</sub>). The corresponding EDX spectra of the NRs.

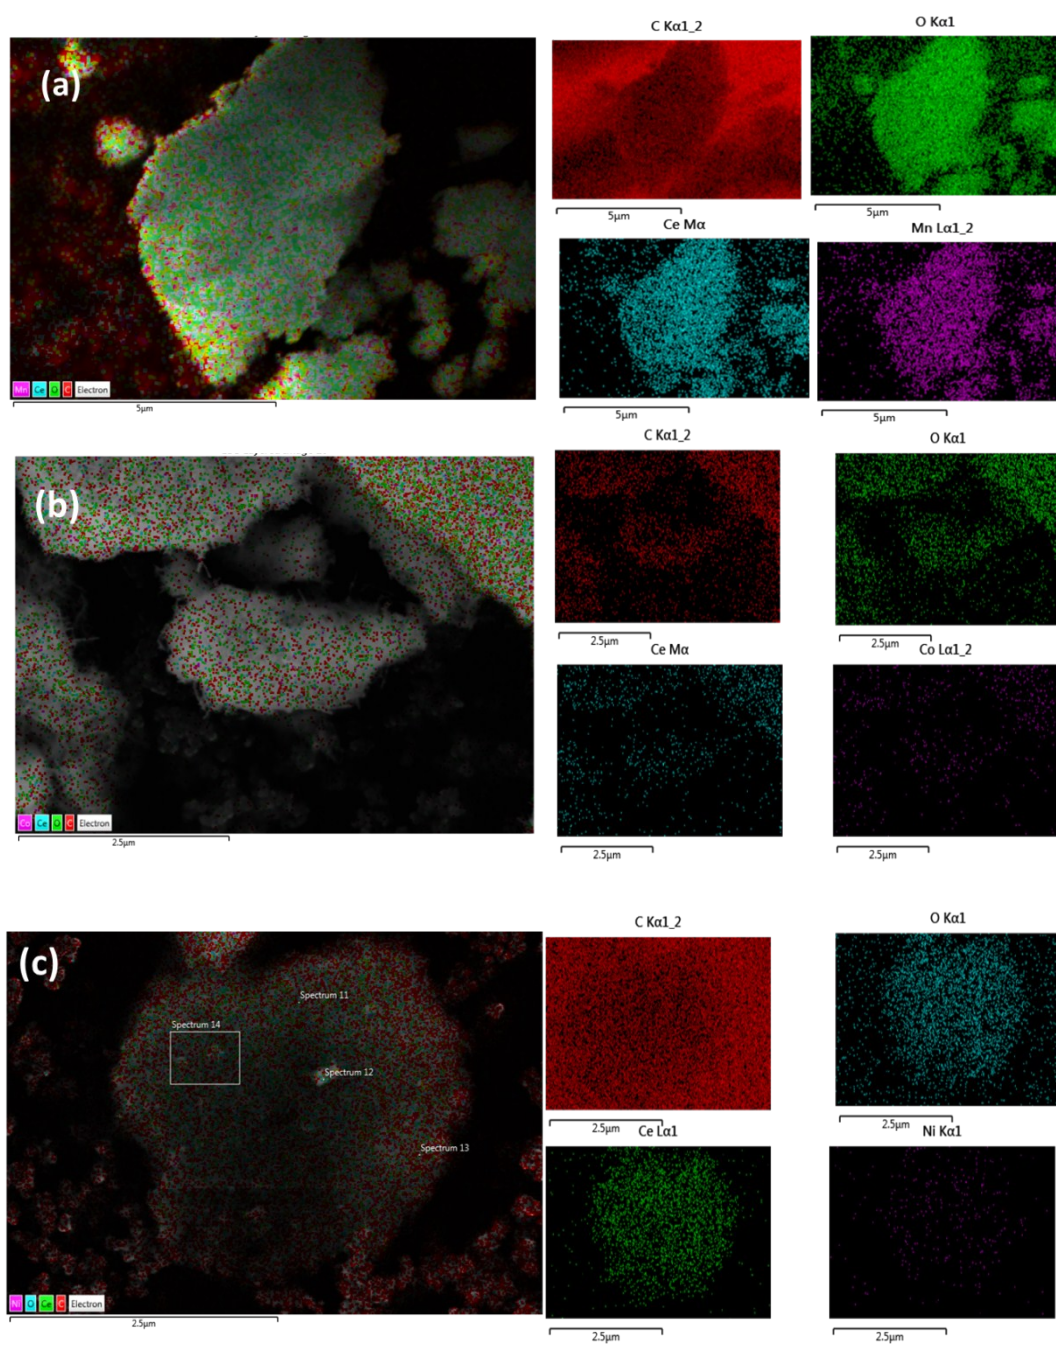

Fig. S2 EDX elemental mapping of (a)  $\text{Ce}_{0.9}\text{Mn}_{0.1}\text{O}_{2-\delta}$  (Mn-CeO<sub>2</sub>), (b)  $\text{Ce}_{0.9}\text{Co}_{0.1}\text{O}_{2-\delta}$  (Co-CeO<sub>2</sub>), and (c)  $\text{Ce}_{0.9}\text{Ni}_{0.1}\text{O}_{2-\delta}$  (Ni-CeO<sub>2</sub>) NRs.

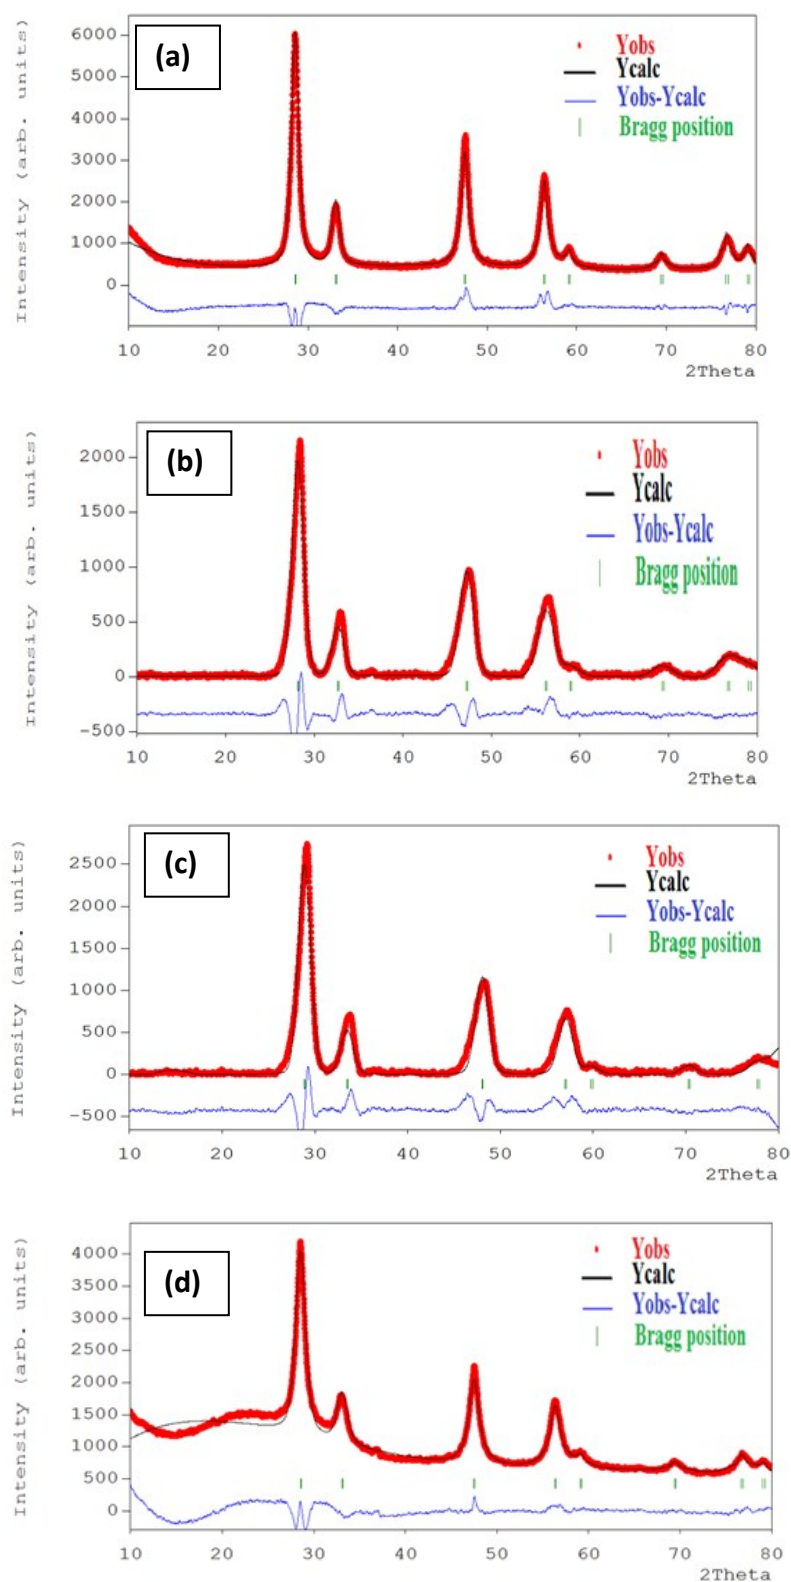

Fig. S3. Rietveld refinement of the XRD patterns of (a)  $\text{CeO}_2$ , (b)  $\text{Ce}_{0.9}\text{Mn}_{0.1}\text{O}_{2-\delta}$  (Mn- $\text{CeO}_2$ ), (c)  $\text{Ce}_{0.9}\text{Co}_{0.1}\text{O}_{2-\delta}$  (Co- $\text{CeO}_2$ ), and (d)  $\text{Ce}_{0.9}\text{Ni}_{0.1}\text{O}_{2-\delta}$  (Ni- $\text{CeO}_2$ ). Experimental data are indicated by red circles while the refined values form the continuous black line. The difference between the experimental and calculated curves is represented by the lowest blue line.



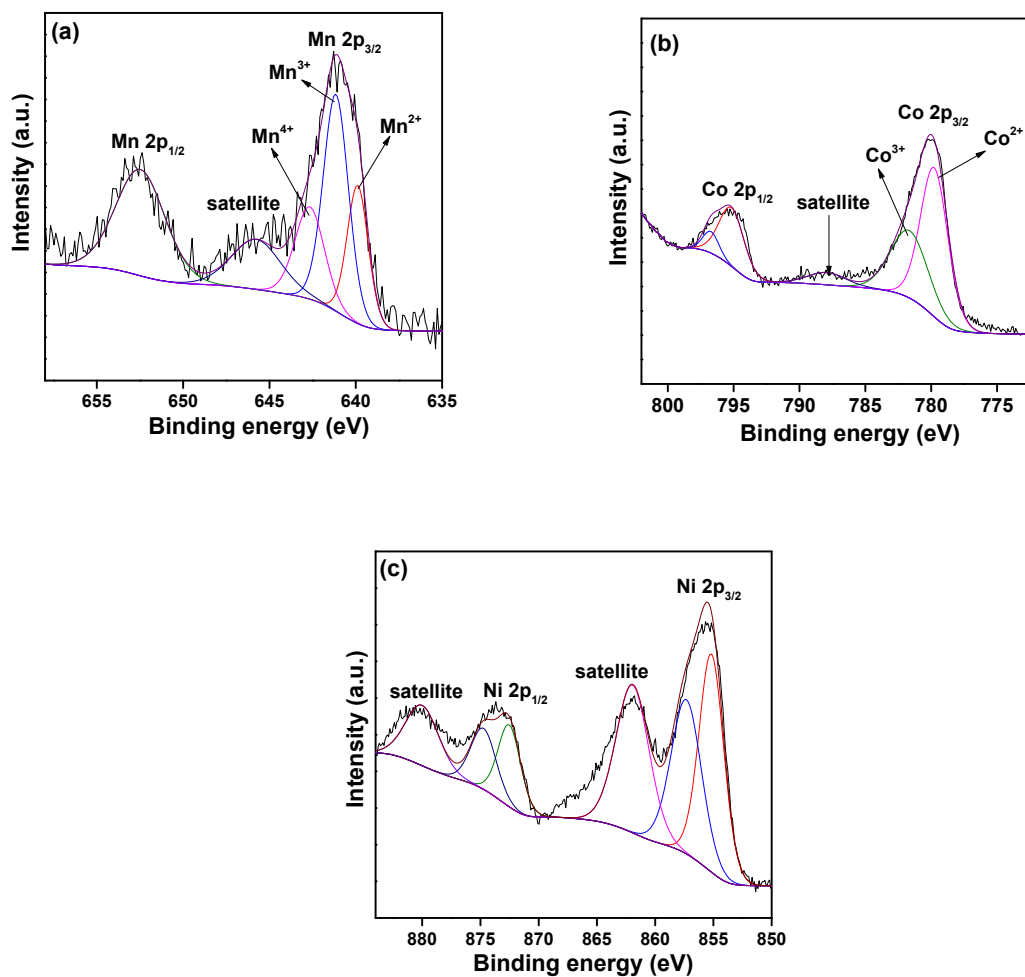

Fig. S4 XPS spectra of  $\text{Ce}_{0.9}\text{Mn}_{0.1}\text{O}_{2-\delta}$  (Mn-CeO<sub>2</sub>),  $\text{Ce}_{0.9}\text{Co}_{0.1}\text{O}_{2-\delta}$  (Co-CeO<sub>2</sub>), and  $\text{Ce}_{0.9}\text{Ni}_{0.1}\text{O}_{2-\delta}$  (Ni-CeO<sub>2</sub>) NRs; (a) Mn 2p, (b) Co 2p, and (c) Ni 2p.

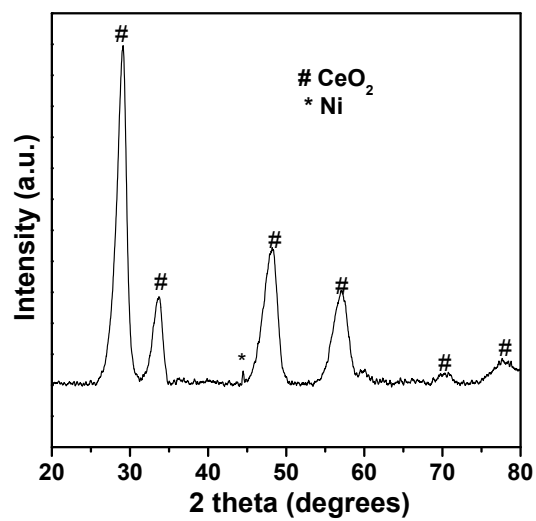

Fig. S5 XRD spectra of used  $\text{Ce}_{0.9}\text{Ni}_{0.1}\text{O}_{2-\delta}$  (Ni- $\text{CeO}_2$ ) NRs



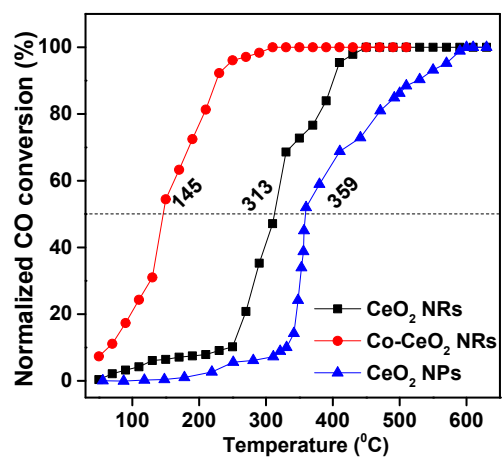

Fig. S6 Normalized CO conversions of CeO<sub>2</sub> NRs, Co-CeO<sub>2</sub> NRs, and CeO<sub>2</sub> NPs.

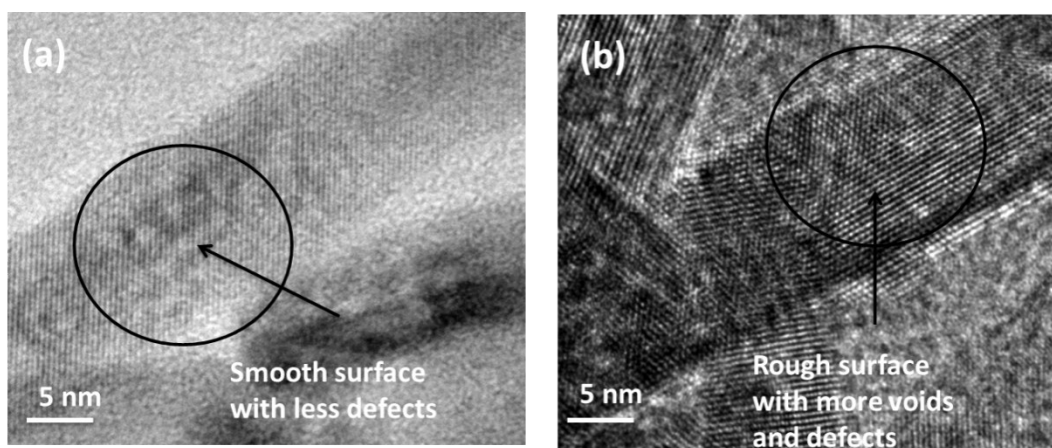

Fig. S7 HR-TEM images of (a) pure  $\text{CeO}_2$  and (b)  $\text{Co-CeO}_2$  NRs.
